# Supplementary material for: A tight control of Rif1 by Oct4 and Smad3 is critical for mouse embryonic stem cell stability
Source: PubMed Central journal article supplement (PMC4669749; doi:10.1038/cddis.2014.551), 2015-01-08
Supplement: cddis2014551x1.pdf [file cddis2014551x1.pdf]

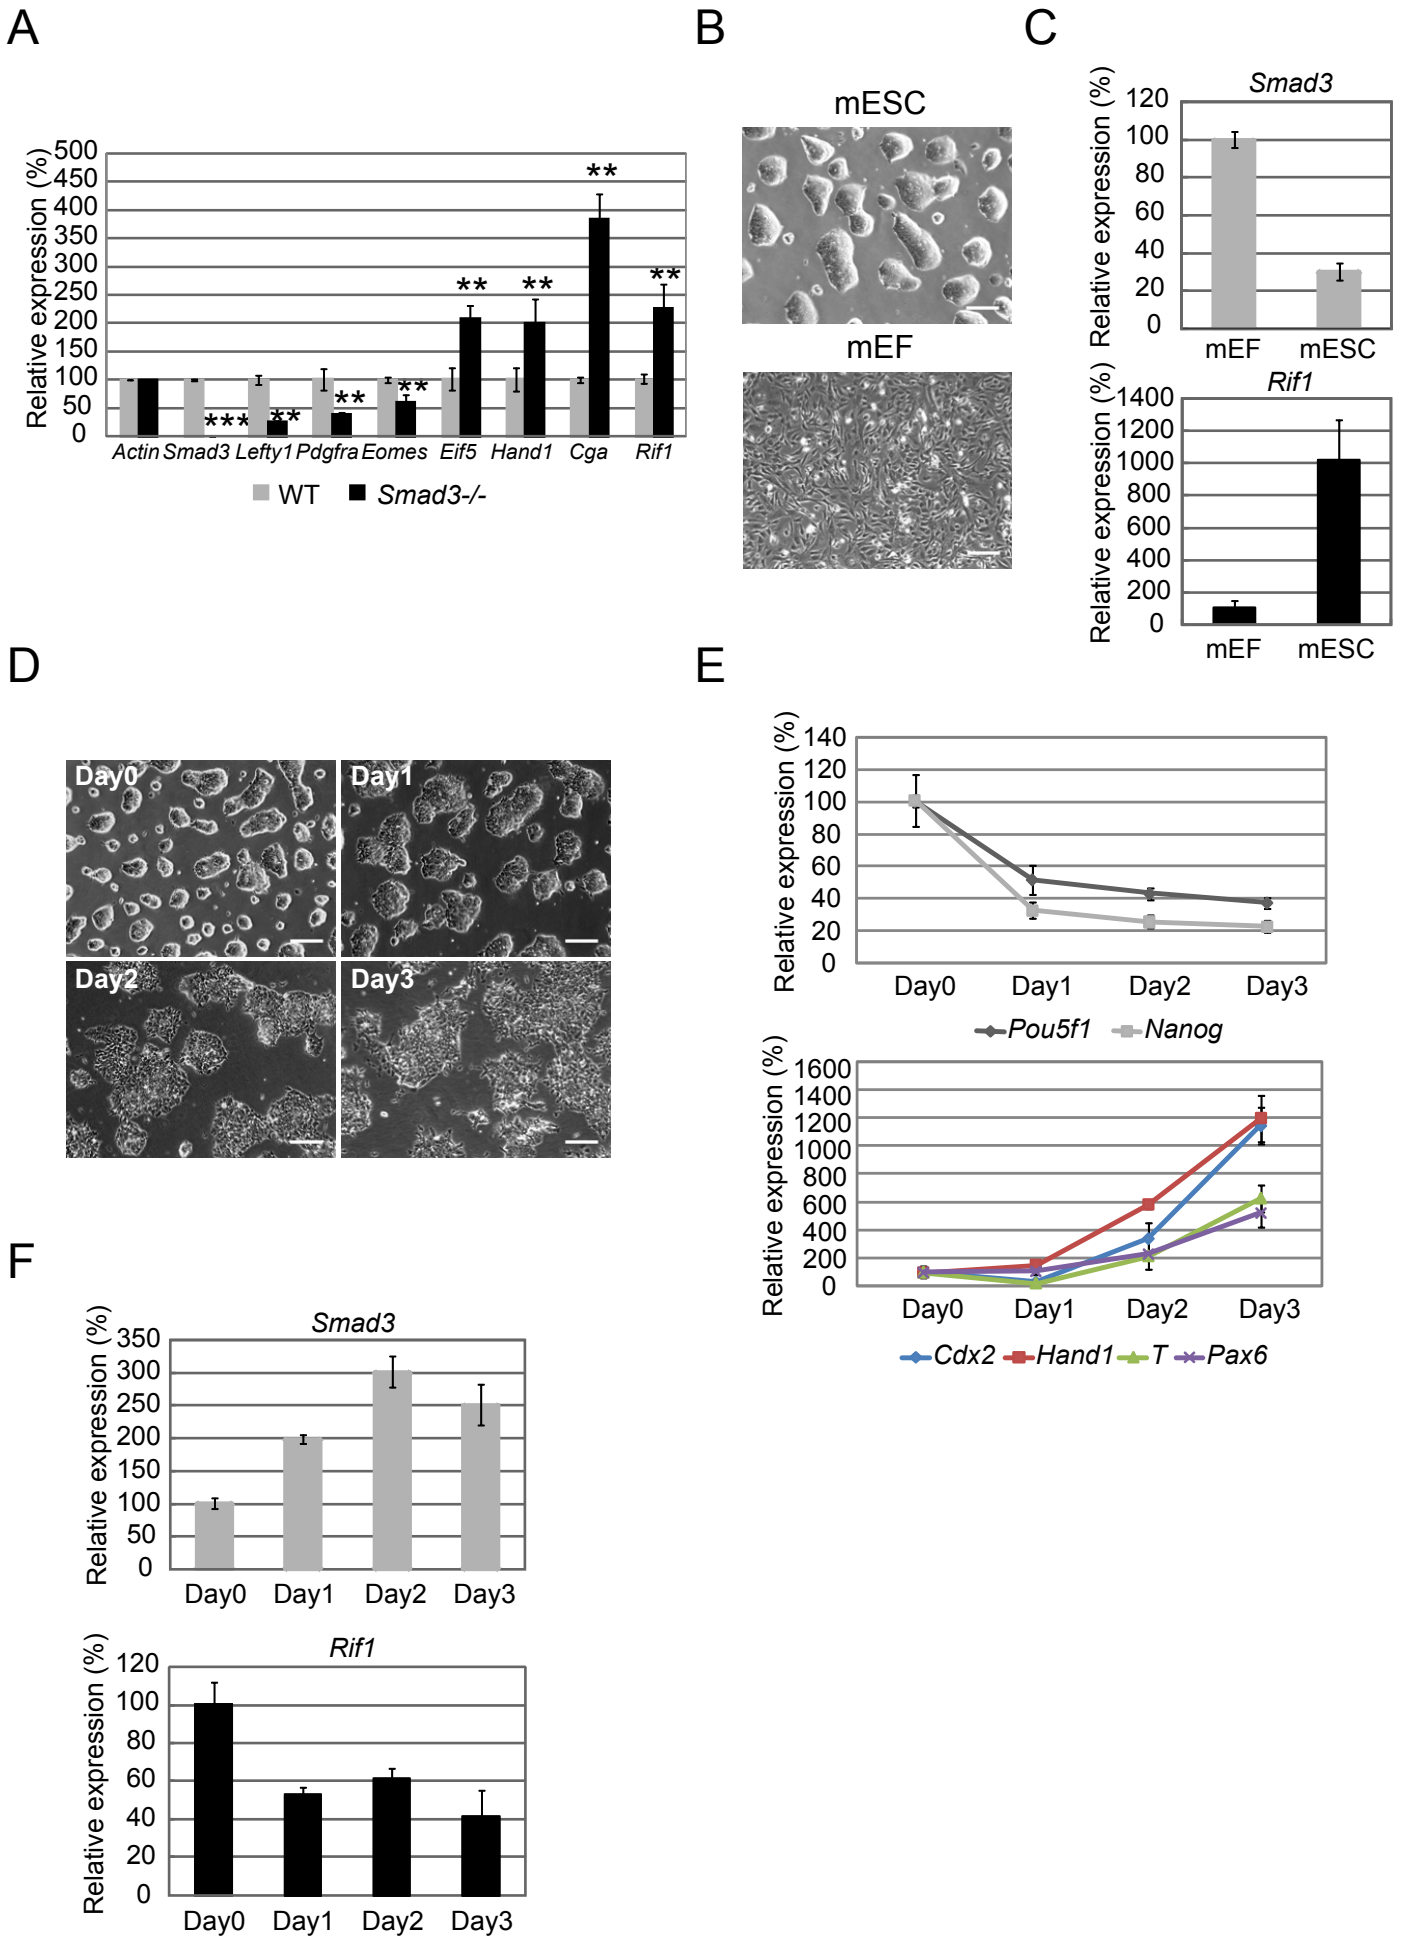

Figure S1

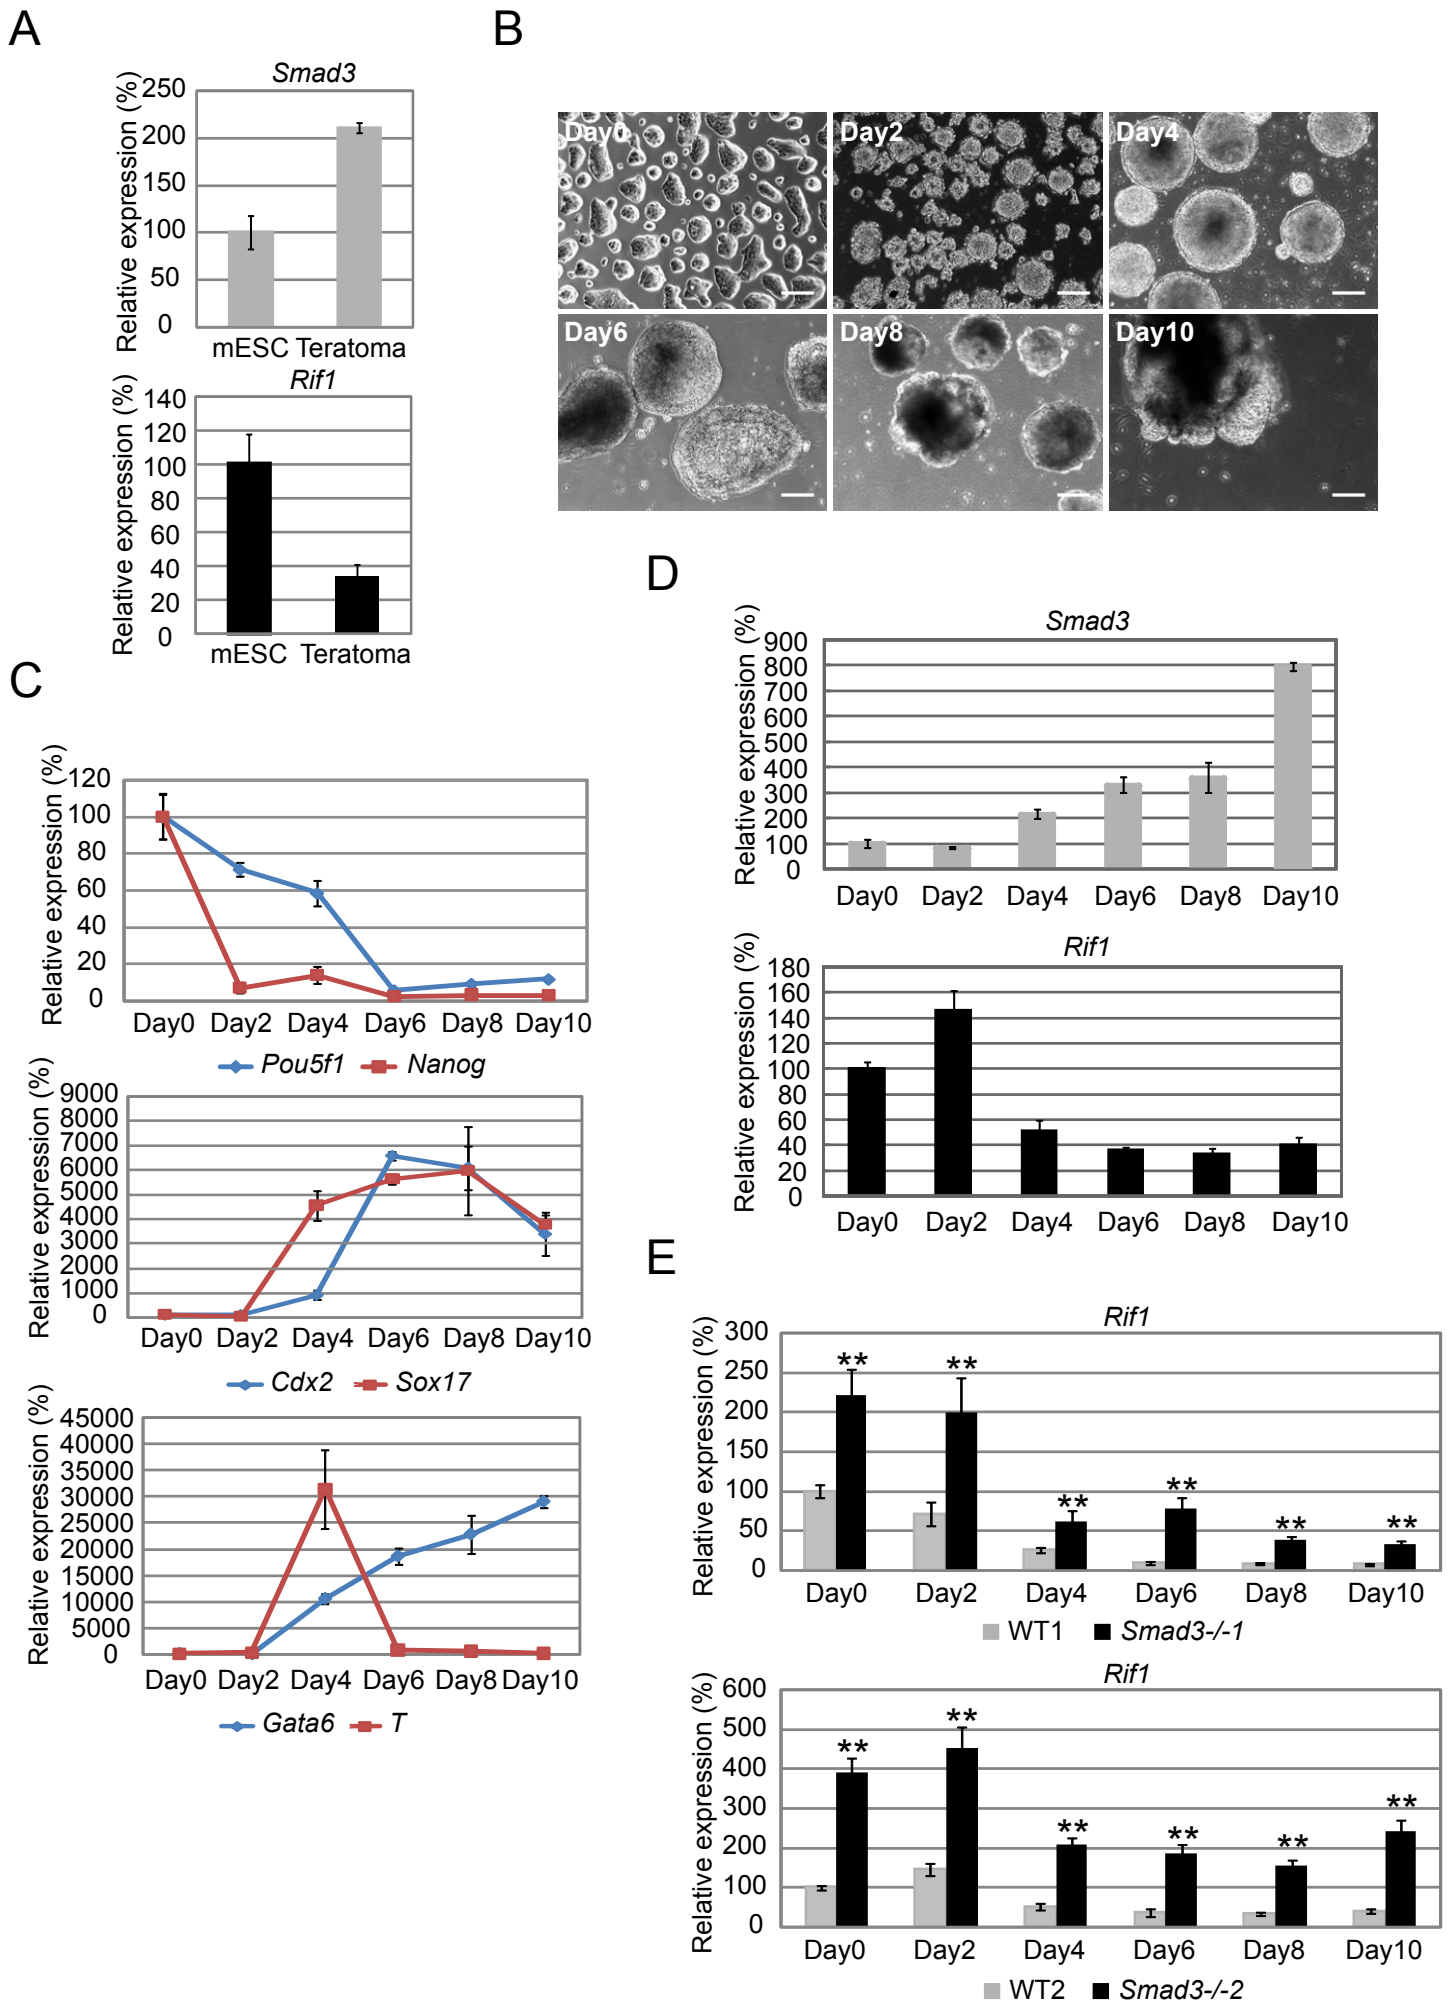

Figure S2

**A**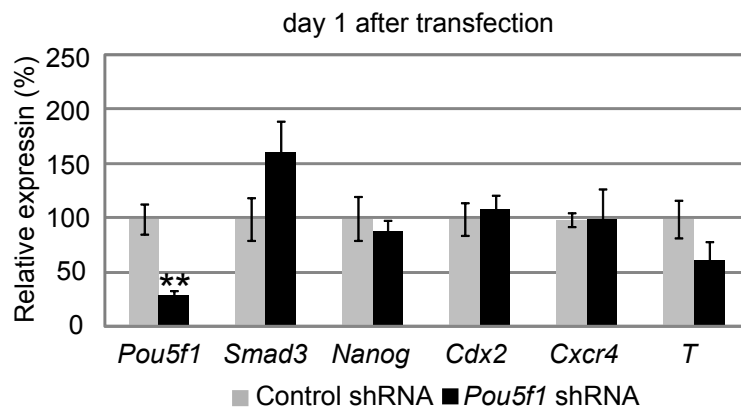**B**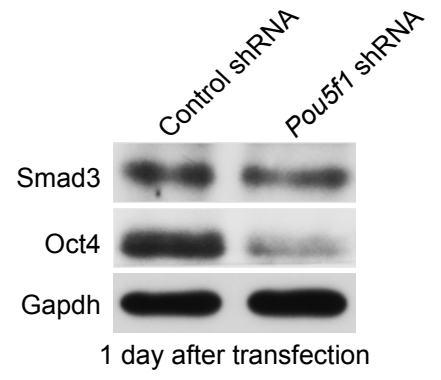

A

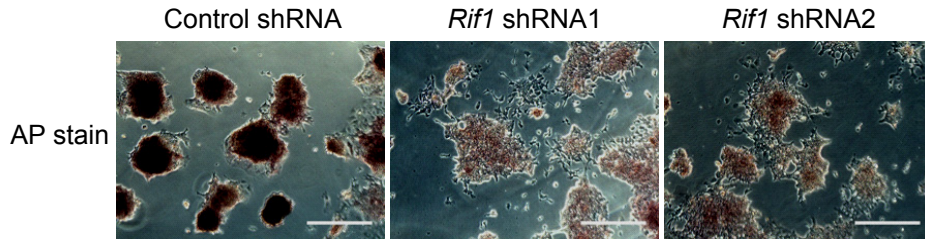

B

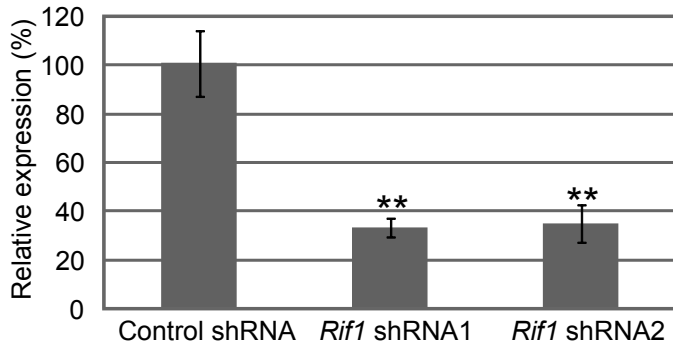

C

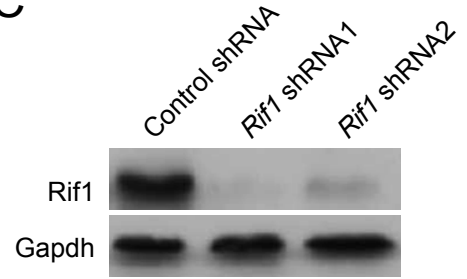

D

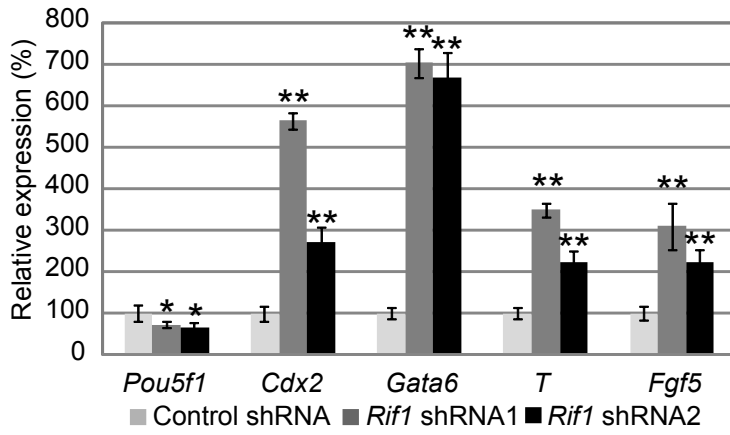

Figure S4

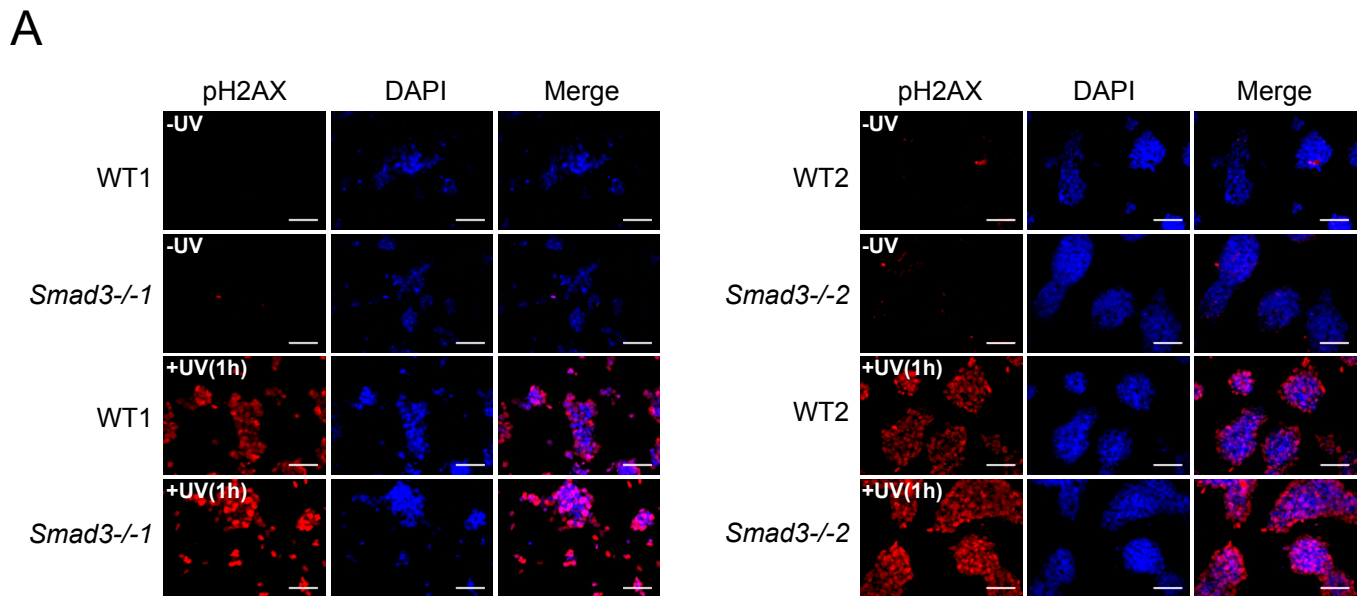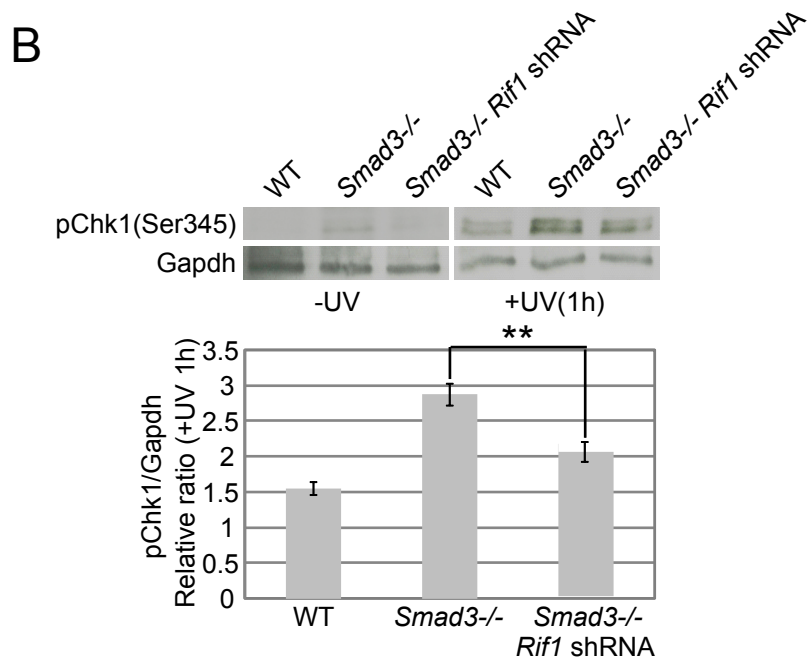

Figure S5

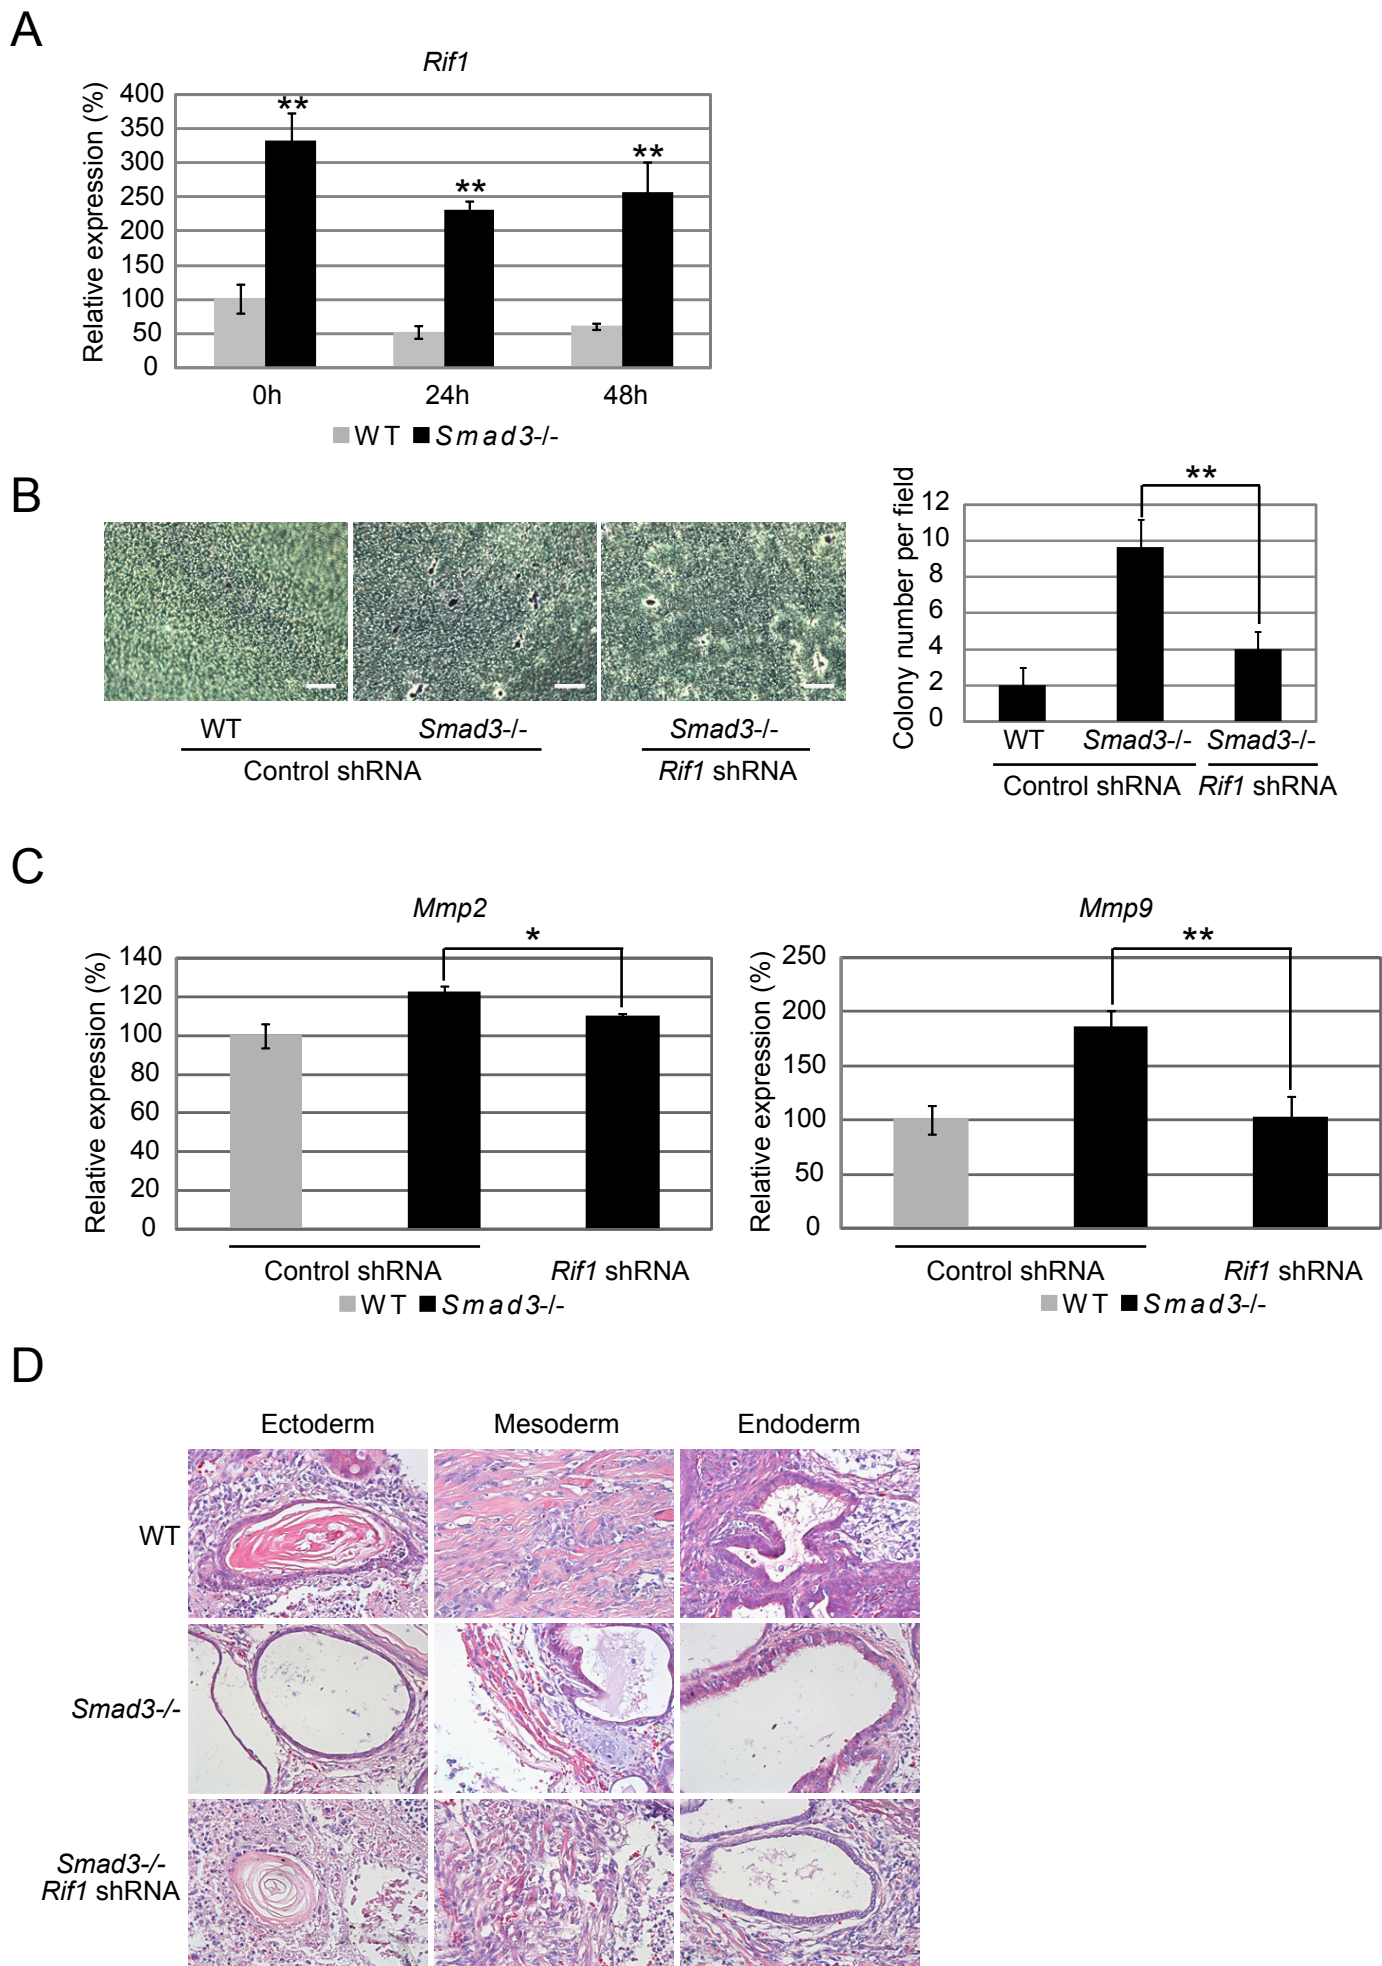

Figure S6

A

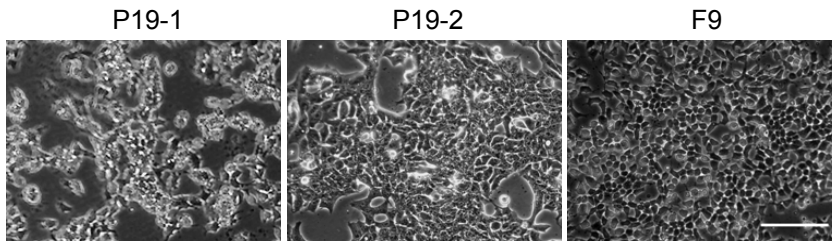

B

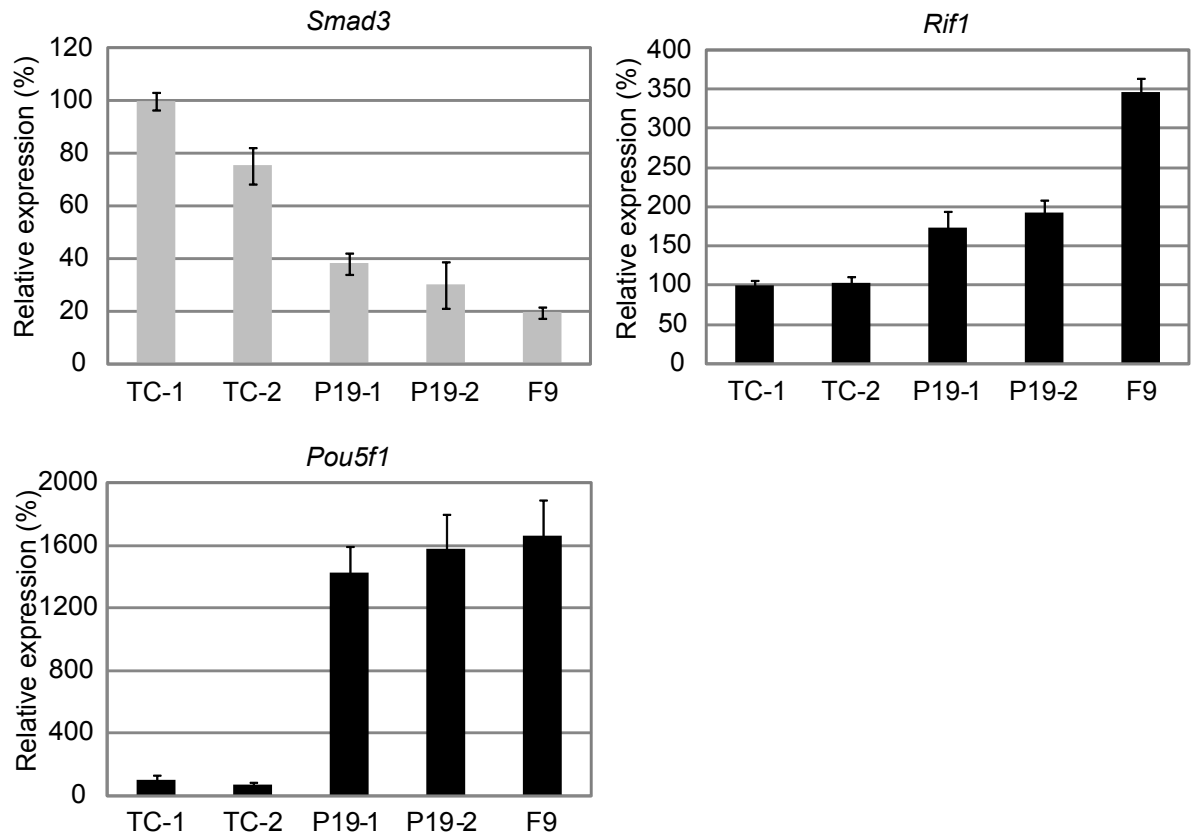

Table S1. Primers used in the study

| Real-time PCR primers |                                      |
|-----------------------|--------------------------------------|
| Actin F               | 5'-ACCAACTGGGACGACATGGAGA-3'         |
| Actin R               | 5'-TACGACCAGAGGCATACAGGGAC-3'        |
| Smad3 F               | 5'-CTGGGCCTACTGTCCAATGT-3'           |
| Smad3 R               | 5'-CATCTGGGTGAGGACCTTGT-3'           |
| Oct4 F                | 5'-AAGCCTGCCAGGAGCAA-3'              |
| Oct4 R                | 5'-ATCCGGCGTTATGCTGCTCT-3'           |
| Nanog F               | 5'-GGCTATCTGGTGAACGCATCTGGAAG-3'     |
| Nanog R               | 5'-AACTGTACGTAAGGCTGCAGAAAGTCCTC-3'  |
| Rif1 F                | 5'-ACTGTCTCCACGGATGAAGA-3'           |
| Rif1 R                | 5'-CAAATAGCTGGCTTCCAGTG-3'           |
| Lefty1 F              | 5'-TGTGTGTGCTCTTTGCTTCC-3'           |
| Lefty1 R              | 5'-GGGGATTCTGTCCTTGGTTT-3'           |
| Lefty2 F              | 5'-CAGCCAGAATTTTCGAGAGGT-3'          |
| Lefty2 R              | 5'-CAGTGGATTGGAGCCATC-3'             |
| Ccnd2 F               | 5'-AAGCCTGCCAGGAGCAA-3'              |
| Ccnd2 R               | 5'-ATCCGGCGTTATGCTGCTCT-3'           |
| Cdx2 F                | 5'-CCTGCGACAAGGGCTTGTTTAG-3'         |
| Cdx2 R                | 5'-TCCCGACTTCCCTTACCATAC-3'          |
| Pax6 F                | 5'-GCATGCAGAACAGTCACAGCGGA-3'        |
| Pax6 R                | 5'-ACTCCCGTTTATACTGGGCTATTT-3'       |
| Hand1 F               | 5'-GCCAAGGATGCACAAGCA-3'             |
| Hand1 R               | 5'-GGGCTGCTGAGGCAACTC-3'             |
| Fgf5                  | 5'-GAGAGTGGTACGTGGCCCTGAACAAGAGAG-3' |
| Fgf5                  | 5'-CTTCAGTCTGTACTTCACTGGGCTGGGACT-3' |
| T F                   | 5'-CATCGGAACAGCTCTCCAACCTAT-3'       |
| T R                   | 5'-GTGGGCTGGCGTTATGACTCA-3'          |
| Gata6 F               | 5'-TGCAAGATTGCATCATGACAGA-3'         |
| Gata6 R               | 5'-TGACCTCAGATCAGCCACGTTA-3'         |
| Sox17 F               | 5'-TTCTGTACACTTTAATGAGGCTGTTC-3'     |
| Sox17 R               | 5'-TTGTGGGAAGTGGGATCAAG-3'           |
| Cxcr4 F               | 5'-AGCATGACGGACAAGTACC-3'            |
| Cxcr4 R               | 5'-GATGATATGGA AGCCTTACAC-3'         |
| Mmp2 F                | 5'-ATGATGACATCAAGGGGATC-3'           |
| Mmp2 R                | 5'-CGCCAAATAAACCGGTCCTT-3'           |
| Mmp9 F                | 5'-GAGCTGTGCGTCTTCCCTTC-3'           |
| Mmp9 R                | 5'-GGAATGATCTAAGCCCAGTGC-3'          |



|                              |                                                                   |
|------------------------------|-------------------------------------------------------------------|
| Eomes F                      | 5'-CCTGGTGGTGTGTTTGTG-3'                                          |
| Eomes R                      | 5'-TTTAATAGCACCGGGCACTC-3'                                        |
| Elf5 F                       | 5'-CCCTCCTCCTTCAAACC-3'                                           |
| Elf5 R                       | 5'-AAGTTGCCACAAGACCATCC-3'                                        |
| Pdgfra F                     | 5'-ACGTTCAAGACCAGCGAGTT-3'                                        |
| Pdgfra R                     | 5'-CGATCGTTTCTCCTGCCTTA-3'                                        |
| CGA F                        | 5'-GCCAGAGTGGAGAATCATAC-3'                                        |
| CGA R                        | 5'-AACTGAAGCGCGTCAGAAGT-3'                                        |
| <b>ChIP qPCR primers</b>     |                                                                   |
| Actin F                      | 5'-GTTACCCGGGATACTGACCT-3'                                        |
| Actin R                      | 5'-GGCACCACACCTTCTAC-3'                                           |
| Lefty1 F                     | 5'-GTAGCCAGCAGACAGGACAA-3'                                        |
| Lefty1 R                     | 5'-ATCCCAATCCACATTCA-3'                                           |
| Lefty2 F                     | 5'-GCAATCTGCCACTGTAAA-3'                                          |
| Lefty2 R                     | 5'-TCGATCTTCCAAGACTC-3'                                           |
| Rif1-1 F                     | 5'-CCAATTCTAGGCAGTTGCCT-3'                                        |
| Rif1-1 R                     | 5'-GGGAGTGTTGCTAAAGG-3'                                           |
| Rif1-2 F                     | 5'-ATCTCTGTGTTGAGCACCC-3'                                         |
| Rif1-2 R                     | CGTGGAATCTTTCCGTCC                                                |
| <b>shRNA sequences</b>       |                                                                   |
| Rif1 shRNA1 F                | 5'-GATCCCCGAACCGTATTCAGAATCAAttcaagagaTTGATTCTGAATACGGTTCTTTTA-3' |
| Rif1 shRNA1 R                | 5'-AGCTTAAAAAGAACCGTATTCAGAATCAAtctctgaaTTGATTCTGAATACGGTTCCGG-3' |
| Rif1 shRNA2 F                | 5'-GATCCCCGAGTACAATAAGTGTTGATtcaagagaATCAACACTTATTGACTCTTTTA-3'   |
| Rif1 shRNA2 R                | 5'-AGCTTAAAAAGAGTACAATAAGTGTTGATtctctgaaATCAACACTTATTGACTCCGG-3'  |
| <b>Rif1 promoter primers</b> |                                                                   |
| Rif1 F                       | 5'-GTGGTCACGCGTTGTAGTTCTGAGTCTCTGG-3'                             |
| Rif1 R                       | 5'-ACGTCACCTCGAGGCTAGAGATGGGTGATGTA-3'                            |
| <b>cDNA clone primers</b>    |                                                                   |
| GFP F                        | 5'-ATACCGAGATCTATGGTGAGCAAGGGCGAGGAG-3'                           |
| GFP R                        | 5'-ATACCCCTCGAGCTATCGAGATCTGAGTCCGGAC-3'                          |
| Smad3 F                      | 5'-GTGGTCAGATCTATGTCGTCCATCCTGCCCT-3'                             |
| Smad3 R                      | 5'-ACGTCACCTCGAGCTAAGACACACTGGAACAGC-3'                           |
| Pou5f1 F                     | 5'-GTGGTCACGCGTATGGCTGGACACCTGGCTT-3'                             |
| Pou5f1 R                     | 5'-ACGTCACCTCGAGTCAGTTTGAATGCATGGGAG-3'                           |
| <b>Genotyping primers</b>    |                                                                   |
| pLvth-Rif1 shRNA F           | 5'-CGCTGACGTCATCAACCCGCTCCAAGGA-3'                                |
| pLvth-Rif1 shRNA R           | 5'-CGTATAATGTATGCTATACGAAG-3'                                     |

## Supplementary figure legends

### Figure S1

- (A) Quantitative real-time PCR to validate the mRNA level of 8 genes randomly selected from microarray analysis in WT ES cells and *Smad3*<sup>-/-</sup> ES cells. *Actin* was analyzed as an internal control. The data are shown as the mean  $\pm$  S.D (n=3). Statistically significant differences, calculated through student-t tests, are indicated (\*, P<0.05; \*\*, P<0.01; \*\*\*, P<0.001). The gene expression changes of the selected genes are consistent with the microarray result.
- (B) Phase contrast microscopy of mouse ES cells and embryonic fibroblasts. Scale bar equals to 200 $\mu$ m.
- (C) mRNA expression level of *Smad3* (blue) and *Rif1* (black) was determined through real-time PCR analysis in mouse ES cells and embryonic fibroblasts (MEF), *Actin* was analyzed as an internal control. The data are shown as the mean  $\pm$  S.D (n=3).
- (D) Phase contrast microscopy of mouse ES cell differentiated cells on withdrawing 2i and LIF from day 0 to day 3. Scale bar equals to 200 $\mu$ m.
- (E) mRNA expression levels of pluripotency genes (*Pou5f1* and *Nanog*) and differentiation genes (*Cdx2*, *Hand1*, *T* and *Pax6*) was determined through real-time PCR analysis in mouse ES cells and ES cell differentiated cells under withdrawing 2i and LIF condition from day 0 to day 3. *Actin* was analyzed as an internal control. The data are shown as the mean  $\pm$  S.D (n=3).
- (F) mRNA expression levels of *Smad3* (blue) and *Rif1*(black) were determined through real-time PCR analysis in mouse ES cells and ES cell differentiated cells under withdrawing 2i and LIF condition. *Actin* was analyzed as an internal control. The data are shown as the mean  $\pm$  S.D (n=3).

### Figure S2

- (A) mRNA expression levels of *Smad3* (blue) and *Rif1* (black) were determined through real-time PCR analysis in mouse ES cells and teratoma cells. *Actin* was analyzed as an internal control. The data are shown as the mean  $\pm$  S.D (n=3).
- (B) Phase contrast microscopy of mouse embryoid body development from day 0 to day 10. Scale bar equals to 200  $\mu$ m.

- (C) mRNA expression levels of pluripotency genes (*Pou5f1* and *Nanog*) and differentiation genes (*Cdx2*, *T*, *Sox17* and *Gata6*) were determined through real-time PCR analysis in mouse ES cells and mouse embryoid body development from day 0 to day 10. *Actin* was analyzed as an internal control. The data are shown as the mean  $\pm$  S.D (n=3).
- (D) mRNA expression levels of *Smad3* (blue) and *Rif1* (black) were determined through real-time PCR analysis in mouse ES cells and embryoid body cells. *Actin* was analyzed as an internal control. The data are shown as the mean  $\pm$  S.D (n=3).
- (E) Quantitative real-time PCR to examine the mRNA level of *Rif1* in WT ES cell (WT1 and WT2) and *Smad3*<sup>-/-</sup> (*Smad3*<sup>-/-1</sup> and *Smad3*<sup>-/-2</sup>) ES cell formed embryoid body from day 0 to day 10. *Actin* was analyzed as a control. The data are shown as the mean  $\pm$  S.D (n=3). Statistically significant differences, calculated through student-t tests, are indicated (\*, P<0.05; \*\*, P<0.01; \*\*\*, P<0.001).

### Figure S3

- (A) mRNA expression levels of *Pou5f1*, *Nanog*, *Smad3* and differentiation genes (*Cdx2*, *T* and *Cxcr4*) were determined through real-time PCR analysis in mouse ES cells transfected with pSuper shRNA control and pSuper-*Pou5f1*-shRNA plasmids and selected with 1 $\mu$ g/ml puromycin for 1 day. *Actin* was analyzed as an internal control. The data are shown as the mean  $\pm$  S.D (n=3). Statistically significant differences, calculated through student-t tests, are indicated (\*, P<0.05; \*\*, P<0.01; \*\*\*, P<0.001).
- (B) Western blot analysis of the expression of Oct4 and Smad3 in mouse ES cells transfected with control shRNA and *Pou5f1* shRNA plasmids and selected with 1 $\mu$ g/ml puromycin for 1 day. Gapdh expression level was used as an internal control.

### Figure S4

- (A) Alkaline phosphatase stain of WT mouse ES cells transfected with pSuper control and pSuper-*Rif1*-shRNA plasmids. Scale bar equals to 200  $\mu$ m.
- (B) Quantitative real-time PCR to examine the mRNA level of *Rif1* in ES cells transfected with pSuper control and pSuper-*Rif1*-shRNA plasmids. *Actin* was analyzed as an internal control. The data are shown as the mean  $\pm$  S.D (n=3).

Statistically significant differences, calculated through student-t tests, are indicated (\*, P<0.05; \*\*, P<0.01; \*\*\*, P<0.001).

(C) Western blot analysis of the expression of *Rif1* in mouse ES cells transfected with pSuper and pSuper-*Rif1*-shRNA plasmids. *Gapdh* expression level was used as an internal control.

(D) mRNA levels of the pluripotency gene (*Pou5f1*) and differentiation genes (*Cdx2*, *Gata6*, *T* and *Fgf5*) were determined through real-time PCR analysis in mouse ES cells transfected with pSuper shRNA control and pSuper-*Rif1*-shRNA plasmids and selected with 1 µg/ml puromycin for 3 days. *Actin* was analyzed as an internal control. The data are shown as the mean ± S.D (n=3). Statistically significant differences, calculated through student-t tests, are indicated (\*, P<0.05; \*\*, P<0.01; \*\*\*, P<0.001).

#### Figure S5

(A) Immunofluorescence stain with pH2AX (Ser139) antibody in WT (WT1 and WT2) and *Smad3*<sup>-/-</sup> (*Smad3*<sup>-/-1</sup> and *Smad3*<sup>-/-2</sup>) ES cells before and after 1 hour recovery for UV (40 mJ/cm<sup>2</sup>) irradiation treatment. Scale bar equals to 200 µm.

(B) Western blot analysis the expression of pChk1 (Ser345) in WT, *Smad3*<sup>-/-</sup> and *Rif1* shRNA transduced *Smad3*<sup>-/-</sup> ES cells before and after 3 hour recovery for UV (40mJ/cm<sup>2</sup>) irradiation treatment. *Gapdh* expression level was used as an internal control. Densitometric analysis of the western blot data of pChk1 (Ser345) after UV irradiation treatment. The data are shown as the mean ± S.D (n=2). Statistically significant differences, calculated through student-t tests, are indicated (\*, P<0.05; \*\*, P<0.01; \*\*\*, P<0.001).

#### Figure S6

(A) Quantitative real-time PCR to examine the mRNA level of *Rif1* in WT and *Smad3*<sup>-/-</sup> ES cells under -2i-LIF+RA conditions from day 0 to day 2. The data are shown as the mean ± S.D (n=3). Statistically significant differences, calculated through student-t tests, are indicated (\*, P<0.05; \*\*, P<0.01; \*\*\*, P<0.001).

(B) Transwell invasive assay for WT, *Smad3*<sup>-/-</sup> and *Smad3*<sup>-/-</sup> with *Rif1* shRNA ES cells under -2i-LIF+RA conditions. Scale bar equals to 200 µm. Invasive colonies were counted for at least 3 fields individually. The data are shown as the mean ± S.D

(n=3). Statistically significant differences, calculated through student-t tests, are indicated (\*, P<0.05; \*\*, P<0.01; \*\*\*, P<0.001).

(C) Quantitative real-time PCR to examine the mRNA levels of *Mmp2* and *Mmp9* in WT ES cells and *Smad3*<sup>-/-</sup> ES cells transfected with control shRNA and *Rif1* shRNA plasmids. *Actin* was analyzed as an internal control. The data are shown as the mean  $\pm$  S.D (n=3). Statistically significant differences, calculated through student-t tests, are indicated (\*, P<0.05; \*\*, P<0.01; \*\*\*, P<0.001).

(D) Images of hematoxylin/eosin stained section of WT ES cell, control *Smad3*<sup>-/-</sup> ES cell and *Rif1* shRNA transduced *Smad3*<sup>-/-</sup> ES cell formed teratomas. All three germ layer tissues can be observed.

### **Figure S7**

(A) Phase contrast microscopy of mouse teratocarcinoma cell lines P19-1, P19-2 and F9. Scale bar equals to 200 $\mu$ m.

(B) Quantitative real-time PCR to examine the mRNA levels of *Pou5f1*, *Smad3* and *Rif1* in mouse ESC-formed teratoma cells *in vivo* (TC-1 and TC-2) and mouse embryonic teratocarcinoma cell lines P19 (P19-1 and P19-2) and F9. *Actin* was analyzed as an internal control. The data are shown as the mean  $\pm$  S.D (n=3).

### **Table S1 Primers used in the study**
